# Supplementary material for: Differences in Motor Imagery Ability between People with Parkinson’s Disease and Healthy Controls, and Its Relationship with Functionality, Independence and Quality of Life
Source: MDPI journal article supplement (doi:10.3390/healthcare11212898), 2023-11-03
Supplement: s1 [file s1]

Supplementary Table S1. Correlations between Motor Imagery vividness and functional scales in people with Parkinson's Disease (PD).

|                               | MIQ-RS Total          | MIQ-RS Visual         | MIQ-RS<br>Kinaesthetic | KVIQ-34 Total         | KVIQ-34 Visual        | KVIQ-34 Kinaesthetic  |
|-------------------------------|-----------------------|-----------------------|------------------------|-----------------------|-----------------------|-----------------------|
| Disease duration              | r = -0.04<br>p = 0.84 | r = -0.05<br>p = 0.8  | r = 0.06<br>p = 0.75   | r = -0.07<br>p = 0.71 | r = -0.13<br>p = 0.49 | r = 0.04<br>p = 0.84  |
| MDS-UPDRS Total               | r = 0.12<br>p = 0.55  | r = 0.15<br>p = 0.41  | r = -0.03<br>p = 0.86  | r = 0.25<br>p = 0.18  | r = 0.26<br>p = 0.56  | r = 0.25<br>p = 0.18  |
| MDS-UPDRS Part I              | r = -0.05<br>p = 0.78 | r = 0.07<br>p = 0.71  | r = -0.33<br>p = 0.07  | r = -0.01<br>p = 0.95 | r = 0.06<br>p = 0.76  | r = -0.09<br>p = 0.65 |
| MDS-UPDRS Part II             | r = 0.11<br>p = 0.57  | r = 0.11<br>p = 0.57  | r = 0.04<br>p = 0.82   | r = 0.19<br>p = 0.3   | r = 0.19<br>p = 0.31  | r = 0.25<br>p = 0.17  |
| MDS-UPDRS Part III            | r = 0.9<br>p = 0.65   | r = 0.11<br>p = 0.56  | r = 0.07<br>p = 0.72   | r = 0.28<br>p = 0.13  | r = 0.29<br>p = 0.11  | r = 0.28<br>p = 0.13  |
| MDS-UPDRS Part IV             | r = -0.08<br>p = 0.66 | r = -0.1<br>p = 0.61  | r = -0.06<br>p = 0.77  | r = -0.11<br>p = 0.55 | r = -0.17<br>p = 0.36 | r = 0.2<br>p = 0.9    |
| Hoehn & Yahr scale            | r = 0.11<br>p = 0.54  | r = 0.12<br>p = 0.51  | r = 0.13<br>p = 0.5    | r = 0.17<br>p = 0.36  | r = 0.18<br>p = 0.33  | r = 0.15<br>p = 0.42  |
| Schwab & England scale        | r = 0.04<br>p = 0.82  | r = 0.04<br>p = 0.85  | r = -0.03<br>p = 0.07  | r = -0.04<br>p = 0.82 | r = -0.12<br>p = 0.53 | r = -0.06<br>p = 0.74 |
| Berg Balance scale            | r = -0.2<br>p = 0.29  | r = -0.17<br>p = 0.37 | r = -0.32<br>p = 0.8   | r = -0.26<br>p = 0.17 | r = -0.25<br>p = 0.17 | r = -0.31<br>p = 0.09 |
| Timed Up and Go test          | r = 0.13<br>p = 0.48  | r = -0.13<br>p = 0.49 | r = -0.01<br>p = 0.1   | r = -0.09<br>p = 0.64 | r = -0.02<br>p = 0.91 | r = -0.01<br>p = 0.95 |
| Box and Blocks test (dom)     | r = -0.01<br>p = 0.1  | r = 0.15<br>p = 0.42  | r = -0.09<br>p = 0.64  | r = -0.05<br>p = 0.81 | r = 0.12<br>p = 0.52  | r = -0.21<br>p = 0.25 |
| Box and Blocks test (non-dom) | r = -0.02<br>p = 0.92 | r = 0.03<br>p = 0.87  | r = 0.01<br>p = 0.1    | r = -0.06<br>p = 0.77 | r = 0.6<br>p = 0.75   | r = -0.16<br>p = 0.38 |
| SF-36 Physical subscale       | r = -0.16<br>p = 0.38 | r = -0.67<br>p = 0.37 | r = -0.13<br>p = 0.5   | r = -0.14<br>p = 0.44 | r = -0.21<br>p = 0.26 | r = -0.16<br>p = 0.39 |
| SF-36 Cognitive subscale      | r = -0.07<br>p = 0.73 | r = -0.8<br>p = 0.67  | r = 0.1<br>p = 0.61    | r = -0.01<br>p = 0.94 | r = -0.1<br>p = 0.59  | r = 0.01<br>p = 0.99  |

Abbreviations: KVIQ-34, Kinaesthetic and Visual Imagery Questionnaire-Extended Version; MIQ-RS, Movement Imagery Questionnaire-Revised Second Edition; SF-36, Short Form Health Survey-36; MDS-UPDRS, Movement Disorder Society - Unified Parkinson's Disease Rating Scale.

Supplementary Table S2. Correlations between Motor Imagery temporal accuracy and functional scales in people with Parkinson's Disease (PD).

|                               | iTUG (secs)                          | iTUG (%)                             | iBBT dom (secs)       | iBBT dom (%)          | iBBT non-dom (secs)   | iBBT non-dom (%)      |
|-------------------------------|--------------------------------------|--------------------------------------|-----------------------|-----------------------|-----------------------|-----------------------|
| Disease duration              | r = 0.01<br>p = 0.96                 | r = -0.19<br>p = 0.31                | r = 0.22<br>p = 0.25  | r = 0.19<br>p = 0.32  | r = -0.21<br>p = 0.25 | r = -0.26<br>p = 0.17 |
| MDS-UPDRS Total               | r = -0.05<br>p = 0.8                 | r = -0.2<br>p = 0.27                 | r = 0.19<br>p = 0.3   | r = 0.11<br>p = 0.57  | r = 0.12<br>p = 0.53  | r = 0.07<br>p = 0.72  |
| MDS-UPDRS Part I              | r = -0.32<br>p = 0.08                | <b>r = -0.43</b><br><b>p = 0.02*</b> | r = 0.12<br>p = 0.51  | r = 0.04<br>p = 0.84  | r = 0.04<br>p = 0.83  | r = -0.04<br>p = 0.83 |
| MDS-UPDRS Part II             | r = 0.08<br>p = 0.65                 | r = 0.28<br>p = 0.13                 | r = 0.31<br>p = 0.09  | r = 0.22<br>p = 0.24  | r = 0.17<br>p = 0.37  | r = 0.12<br>p = 0.5   |
| MDS-UPDRS Part III            | r = 0.33<br>p = 0.07                 | r = 0.19<br>p = 0.3                  | r = 0.09<br>p = 0.63  | r = 0.06<br>p = 0.76  | r = 0.1<br>p = 0.58   | r = 0.07<br>p = 0.7   |
| MDS-UPDRS Part IV             | r = -0.07<br>p = 0.72                | r = -0.11<br>p = 0.56                | r = 0.17<br>p = 0.37  | r = 0.11<br>p = 0.55  | r = 0.09<br>p = 0.61  | r = 0.07<br>p = 0.73  |
| Hoehn & Yahr scale            | r = 0.77<br>p = 0.69                 | r = -0.03<br>p = 0.87                | r = 0.37<br>p = 0.58  | r = 0.34<br>p = 0.06  | r = 0.21<br>p = 0.25  | r = 0.18<br>p = 0.35  |
| Schwab & England scale        | r = -0.25<br>p = 0.18                | r = -0.11<br>p = 0.56                | r = -0.08<br>p = 0.66 | r = 0.05<br>p = 0.79  | r = 0.05<br>p = 0.78  | r = 0.1<br>p = 0.61   |
| Berg Balance scale            | <b>r = -0.43</b><br><b>p = 0.02*</b> | r = -0.28<br>p = 0.13                | r = 0.3<br>p = 0.1    | r = -0.31<br>p = 0.09 | r = -0.18<br>p = 0.33 | r = -0.17<br>p = 0.36 |
| Timed Up and Go test          | <b>r = 0.44</b><br><b>p = 0.01*</b>  | r = -0.06<br>p = 0.74                | r = 0.18<br>p = 0.32  | r = 0.1<br>p = 0.58   | r = 0.05<br>p = 0.76  | r = -0.05<br>p = 0.77 |
| Box and Blocks test (dom)     | r = -0.25<br>p = 0.18                | r = -0.23<br>p = 0.21                | r = -0.31<br>p = 0.09 | r = -0.2<br>p = 0.29  | r = -0.19<br>p = 0.32 | r = -0.11<br>p = 0.56 |
| Box and Blocks test (non-dom) | r = -0.05<br>p = 0.8                 | r = 0.02<br>p = 0.9                  | r = -0.17<br>p = 0.36 | r = -0.02<br>p = 0.92 | r = -0.06<br>p = 0.74 | r = 0.04<br>p = 0.83  |
| SF-36 Physical subscale       | r = -0.08<br>p = 0.67                | r = 0.11<br>p = 0.56                 | r = -0.19<br>p = 0.3  | r = -0.08<br>p = 0.66 | r = -0.15<br>p = 0.43 | r = -0.12<br>p = 0.51 |
| SF-36 Cognitive subscale      | r = 0.01<br>p = 0.97                 | r = 0.17<br>p = 0.73                 | r = 0.01<br>p = 0.95  | r = 0.11<br>p = 0.54  | r = -0.08<br>p = 0.66 | r = -0.01<br>p = 0.96 |

Abbreviations: iBBT, Imagined Box and Blocks Tests; iTUG, Imagined Timed Up and Go Test; SF-36, Short Form Health Survey-36; MDS-UPDRS, Movement Disorder Society - Unified Parkinson's Disease Rating Scale. \***p<0.05**.

Supplementary Table S3. Correlations between Motor Imagery vividness and functional scales in healthy controls (HC).

|                               | MIQ-RS Total          | MIQ-RS Visual         | MIQ-RS<br>Kinaesthetic | KVIQ-34 Total         | KVIQ-34 Visual                      | KVIQ-34 Kinaesthetic  |
|-------------------------------|-----------------------|-----------------------|------------------------|-----------------------|-------------------------------------|-----------------------|
| Schwab & England scale        | r = 0.31<br>p = 0.09  | r = 0.31<br>p = 0.09  | r = 0.31<br>p = 0.09   | r = 0.31<br>p = 0.09  | r = 0.3<br>p = 0.1                  | r = 0.31<br>p = 0.09  |
| Berg Balance scale            | r = 0.02<br>p = 0.9   | r = 0.01<br>p = 0.95  | r = 0.01<br>p = 0.97   | r = 0.12<br>p = 0.52  | r = 0.03<br>p = 0.85                | r = 0.11<br>p = 0.57  |
| Timed Up and Go test          | r = -0.15<br>p = 0.42 | r = -0.09<br>p = 0.64 | r = -0.17<br>p = 0.35  | r = -0.23<br>p = 0.21 | r = -0.1<br>p = 0.6                 | r = -0.23<br>p = 0.21 |
| Box and Blocks test (dom)     | r = 0.06<br>p = 0.76  | r = 0.01<br>p = 0.95  | r = 0.08<br>p = 0.67   | r = 0.01<br>p = 0.97  | r = -0.15<br>p = 0.4                | r = 0.05<br>p = 0.78  |
| Box and Blocks test (non-dom) | r = 0.12<br>p = 0.53  | r = 0.05<br>p = 0.8   | r = 0.17<br>p = 0.35   | r = 0.07<br>p = 0.7   | r = -0.09<br>p = 0.64               | r = 0.16<br>p = 0.39  |
| SF-36 Physical subscale       | r = 0.09<br>p = 0.65  | r = 0.18<br>p = 0.33  | r = 0.01<br>p = 0.97   | r = 0.14<br>p = 0.44  | <b>r = 0.36</b><br><b>p = 0.04*</b> | r = 0.02<br>p = 0.91  |
| SF-36 Cognitive subscale      | r = -0.17<br>p = 0.36 | r = -0.11<br>p = 0.56 | r = -0.15<br>p = 0.44  | r = 0.03<br>p = 0.89  | r = 0.09<br>p = 0.64                | r = 0.1<br>p = 0.91   |

Abbreviations: KVIQ-34, Kinaesthetic and Visual Imagery Questionnaire-Extended Version; MIQ-RS, Movement Imagery Questionnaire-Revised Second Edition; SF-36, Short Form Health Survey-36; UPDRS, Unified Parkinson's Disease Rating Scale. \***p<0.05**.

Supplementary Table S4. Correlations between Motor Imagery temporal accuracy and functional scales in healthy controls (HC).

|                               | iTUG (secs)                             | iTUG (%)                             | iBBT dom (secs)       | iBBT dom (%)                        | iBBT non-dom (secs)                    | iBBT non-dom (%)                     |
|-------------------------------|-----------------------------------------|--------------------------------------|-----------------------|-------------------------------------|----------------------------------------|--------------------------------------|
| Schwab & England scale        | r = -0.29<br>p = 0.12                   | r = -0.1<br>p = 0.59                 | r = -0.23<br>p = 0.23 | r = -0.1<br>p = 0.59                | r = -0.16<br>p = 0.38                  | r = -0.12<br>p = 0.51                |
| Berg Balance scale            | <b>r = -0.46</b><br><b>p &lt; 0.01*</b> | r = -0.2<br>p = 0.28                 | r = -0.03<br>p = 0.89 | r = 0.18<br>p = 0.33                | <b>r = -0.5</b><br><b>p &lt; 0.01*</b> | <b>r = -0.38</b><br><b>p = 0.04*</b> |
| Timed Up and Go test          | <b>r = 0.63</b><br><b>p &lt; 0.01*</b>  | r = 0.3<br>p = 0.1                   | r = 0.17<br>p = 0.36  | r = -0.07<br>p = 0.7                | <b>r = 0.51</b><br><b>p &lt; 0.01*</b> | r = 0.35<br>p = 0.05                 |
| Box and Blocks test (dom)     | r = -0.1<br>p = 0.59                    | r = 0.22<br>p = 0.24                 | r = 0.03<br>p = 0.9   | <b>r = 0.42</b><br><b>p = 0.02*</b> | r = -0.22<br>p = 0.23                  | r = 0.04<br>p = 0.82                 |
| Box and Blocks test (non-dom) | r = -0.09<br>p = 0.65                   | r = 0.24<br>p = 0.2                  | r = -0.03<br>p = 0.87 | <b>r = 0.36</b><br><b>p = 0.04*</b> | r = -0.31<br>p = 0.1                   | r = -0.05<br>p = 0.8                 |
| SF-36 Physical subscale       | <b>r = -0.48</b><br><b>p &lt; 0.01*</b> | <b>r = -0.37</b><br><b>p = 0.04*</b> | r = 0.12<br>p = 0.51  | r = 0.13<br>p = 0.48                | r = -0.18<br>p = 0.33                  | r = -0.13<br>p = 0.49                |
| SF-36 Cognitive subscale      | r = 0.02<br>p = 0.91                    | r = 0.11<br>p = 0.55                 | r = 0.2<br>p = 0.28   | r = 0.22<br>p = 0.23                | r = 0.06<br>p = 0.76                   | r = 0.08<br>p = 0.69                 |

Abbreviations: iBBT, Imagined Box and Blocks Tests; iTUG, Imagined Timed Up and Go Test; SF-36, Short Form Health Survey-36; UPDRS, Unified Parkinson's Disease Rating Scale. \***p<0.05**.
